# Supplementary material for: Measuring the patient safety culture at a tertiary care hospital in Pakistan using the Hospital Survey on Patient Safety Culture (HSOPSC)
Source: PubMed Central journal article supplement — BMJ Open Qual. 2023 Mar 17;12(1):e002029. doi: 10.1136/bmjoq-2022-002029 (PMC10030877; doi:10.1136/bmjoq-2022-002029), 2023-03-17
Supplement: bmjoq-2022-002029supp001.pdf [file bmjoq-2022-002029supp001.pdf]

## Supplement

**Table 1:** Overall distribution of positive responses for 42 items included in the 12 patient safety culture dimensions of HSOPSC

| Patient safety culture dimension                                                                                         | Cumulative* (%)                 | 2018 AHRQ Benchmarks (%) |
|--------------------------------------------------------------------------------------------------------------------------|---------------------------------|--------------------------|
| <b>1. Overall perception of safety</b>                                                                                   | <b>70 (&gt;50<sup>th</sup>)</b> | <b>66</b>                |
| a. It is just by chance that more serious mistakes do not happen around here (R)                                         | 44.6(<10 <sup>th</sup> )        | 65                       |
| b. Patient safety is never sacrificed to get more work done                                                              | 79.3 (>90 <sup>th</sup> )       | 63                       |
| c. We have patient safety problems in this unit (R)                                                                      | 72.3 (>25 <sup>th</sup> )       | 74                       |
| d. Our procedures and systems are good at preventing errors from happening                                               | 83.6 (>90 <sup>th</sup> )       | 64                       |
| <b>2. Supervisor/manager's expectations and actions promoting patient safety</b>                                         | <b>70 (&lt;10<sup>th</sup>)</b> | <b>80</b>                |
| a. My supervisor/manager says a good word when he/she sees a job done according to established patient safety procedures | 80.9 (>50 <sup>th</sup> )       | 79                       |
| b. My supervisor/manager seriously considers staff suggestions for improving patient safety                              | 81.3 (>50 <sup>th</sup> )       | 80                       |
| c. Whenever pressure builds up, my supervisor/manager wants us to work faster, even if it means taking shortcuts (R)     | 69.7 (<10 <sup>th</sup> )       | 79                       |
| d. My supervisor/manager overlooks patient safety problems that happen over and over (R)                                 | 48.2(<10 <sup>th</sup> )        | 80                       |
| <b>3. Organizational learning and continuous improvement</b>                                                             | <b>85 (&gt;90<sup>th</sup>)</b> | <b>72</b>                |
| a. We are actively doing things to improve patient safety                                                                | 90.7 (>50 <sup>th</sup> )       | 84                       |
| b. Mistakes have led to positive changes here                                                                            | 78.9 (>90 <sup>th</sup> )       | 63                       |
| c. After we make changes to improve patient safety, we evaluate their effectiveness                                      | 86.0 (>90 <sup>th</sup> )       | 70                       |
| <b>4. Teamwork within units</b>                                                                                          | <b>83 (50<sup>th</sup>)</b>     | <b>82</b>                |
| a. People support one another in this unit                                                                               | 88.9 (>50 <sup>th</sup> )       | 88                       |
| b. When a lot of work needs to be done quickly, we work together as a team to get the work done                          | 85.7 (>25 <sup>th</sup> )       | 87                       |
| c. In this unit, people treat each other with respect                                                                    | 82.9 (>25 <sup>th</sup> )       | 82                       |
| d. When one area in this unit gets really busy, others help out                                                          | 73.7 (>50 <sup>th</sup> )       | 72                       |
| <b>5. Nonpunitive response to error</b>                                                                                  | <b>41 (25<sup>th</sup>)</b>     | <b>47</b>                |
| a. Staff feel like their mistakes are held against them (R)                                                              | 45.5(>25 <sup>th</sup> )        | 53                       |
| b. When an event is reported, it feels like the person is being written up, not the problem (R)                          | 46.8 (>25 <sup>th</sup> )       | 50                       |
| c. Staff worry that mistakes they make are kept in their personnel file (R)                                              | 29.7 (<10 <sup>th</sup> )       | 39                       |
| <b>6. Staffing</b>                                                                                                       | <b>40 (&lt;10<sup>th</sup>)</b> | <b>50</b>                |
| a. We have enough staff to handle the workload                                                                           | 61.1 (>75 <sup>th</sup> )       | 52                       |
| b. Staff in this unit work longer hours than is best for patient care (R)                                                | 25.1 (<10 <sup>th</sup> )       | 48                       |
| c. We work in "crisis mode" trying to do too much, too quickly (R)                                                       | 34.9 (<10 <sup>th</sup> )       | 50                       |
| <b>7. Management support for patient safety</b>                                                                          | <b>73 (&gt;50<sup>th</sup>)</b> | <b>72</b>                |
| a. Hospital management provides a work climate that promotes patient safety                                              | 88.9 (>75 <sup>th</sup> )       | 81                       |

|                                                                                                                                         |                                 |           |
|-----------------------------------------------------------------------------------------------------------------------------------------|---------------------------------|-----------|
| b. The actions of hospital management show that patient safety is a top priority                                                        | 87.0 (>75 <sup>th</sup> )       | 76        |
| c. Hospital management seems interested in patient safety only after an adverse event happens (R)                                       | 42.9 (>25 <sup>th</sup> )       | 59        |
| <b>8. Teamwork across hospital units</b>                                                                                                | <b>76 (&gt;90<sup>th</sup>)</b> | <b>62</b> |
| a. Hospital units do not coordinate well with each other (R)                                                                            | 70.3 (>75 <sup>th</sup> )       | 63        |
| b. There is good cooperation among hospital units that need to work together                                                            | 79.5 (>90 <sup>th</sup> )       | 49        |
| c. It is often unpleasant to work with staff from other hospital units (R)                                                              | 69.8 (>25 <sup>th</sup> )       | 72        |
| d. Hospital units work well together to provide the best care for patients                                                              | 84.6 (>90 <sup>th</sup> )       | 62        |
| <b>9. Hospital handoffs and transitions</b>                                                                                             | <b>66 (&gt;75<sup>th</sup>)</b> | <b>48</b> |
| a. Things “fall between the cracks” when transferring patients from one unit to another (R)                                             | 67.2 (>90 <sup>th</sup> )       | 42        |
| b. Important patient care information is often lost during shift changes (R)                                                            | 69.3 (>90 <sup>th</sup> )       | 53        |
| c. Problems often occur in the exchange of information across hospital units (R)                                                        | 62.4 (>75 <sup>th</sup> )       | 47        |
| d. Shift changes are problematic for patients in this hospital (R)                                                                      | 64.3 (>90 <sup>th</sup> )       | 48        |
| <b>10. Communication openness</b>                                                                                                       | <b>72 (&gt;75<sup>th</sup>)</b> | <b>66</b> |
| a. Staff will freely speak up if they see something that may negatively affect patient care                                             | 87.7 (>90 <sup>th</sup> )       | 79        |
| b. Staff feel free to question the decisions or actions of those with more authority                                                    | 82.3 (>90 <sup>th</sup> )       | 50        |
| c. Staff are afraid to ask questions when something does not feel right (R)                                                             | 46.0 (<10 <sup>th</sup> )       | 68        |
| <b>11. Feedback and communications about error</b>                                                                                      | <b>91 (&gt;90<sup>th</sup>)</b> | <b>69</b> |
| a. We are given feedback about changes put into place based on event reports                                                            | 88.6 (>90 <sup>th</sup> )       | 61        |
| b. We are informed about errors that happen in this unit                                                                                | 91.8 (>90 <sup>th</sup> )       | 69        |
| c. In this unit, we discuss ways to prevent errors from happening again                                                                 | 91.3 (>90 <sup>th</sup> )       | 76        |
| <b>12. Frequency of events reported</b>                                                                                                 | <b>71 (&gt;50<sup>th</sup>)</b> | <b>67</b> |
| a. When a mistake is made, but is caught (noticed, discovered) and corrected before it affects the patient, how often is this reported? | 74.0 (>90 <sup>th</sup> )       | 62        |
| b. When a mistake is made, but has no potential to harm the patient, how often is this reported?                                        | 67.9 (>50 <sup>th</sup> )       | 63        |
| c. When a mistake is made that could harm the patient, but does not, how often is this reported?                                        | 72.0 (>10 <sup>th</sup> )       | 76        |

(R) - Negatively worded items that were reverse coded.

\*% positives (Percentiles compared to AHRQ)

Table 2. Distribution of positive responses among healthcare providers at AKUH.

| <b>Patient safety culture dimension</b>                                                                                  | <b>Nurses and midwives ‡<br/>(n=886)</b> | <b>Physicians<br/>(n=285)</b> | <b>Technologists<br/>(n=469)<br/>(%)</b> | <b>Hospital Aide<br/>(n=658)</b> | <b>Management<br/>(n=250)</b> | <b>Others‡<br/>(n=411)</b> |
|--------------------------------------------------------------------------------------------------------------------------|------------------------------------------|-------------------------------|------------------------------------------|----------------------------------|-------------------------------|----------------------------|
| <b>1. Overall perception of safety</b>                                                                                   | <b>66</b>                                | <b>69</b>                     | <b>73</b>                                | <b>71</b>                        | <b>73</b>                     | <b>71</b>                  |
| a. It is just by chance that more serious mistakes do not happen around here (R)                                         | 39.4                                     | 68.0                          | 45.0                                     | 35.8                             | 53.3                          | 47.3                       |
| b. Patient safety is never sacrificed to get more work done                                                              | 76.1                                     | 63.1                          | 84.5                                     | 86.8                             | 79.4                          | 79.0                       |
| c. We have patient safety problems in this unit (R)                                                                      | 69.3                                     | 69.3                          | 75                                       | 73.4                             | 79.2                          | 72.1                       |
| d. Our procedures and systems are good at preventing errors from happening                                               | 80.6                                     | 75.5                          | 88.1                                     | 88.1                             | 82.2                          | 84.0                       |
| <b>2. Supervisor/manager's expectations and actions promoting patient safety</b>                                         | <b>65</b>                                | <b>76</b>                     | <b>70</b>                                | <b>70</b>                        | <b>75</b>                     | <b>73</b>                  |
| a. My supervisor/manager says a good word when he/she sees a job done according to established patient safety procedures | 76.1                                     | 75.2                          | 82.1                                     | 86.9                             | 82.9                          | 83.1                       |
| b. My supervisor/manager seriously considers staff suggestions for improving patient safety                              | 76.2                                     | 76.7                          | 83.6                                     | 87.6                             | 81.7                          | 82.4                       |
| c. Whenever pressure builds up, my supervisor/manager wants us to work faster, even if it means taking shortcuts (R)     | 70.7                                     | 74.9                          | 68.9                                     | 65.8                             | 72.0                          | 69.7                       |
| d. My supervisor/manager overlooks patient safety problems that happen over and over (R)                                 | 36.3                                     | 78.1                          | 47                                       | 40.8                             | 65.2                          | 56.6                       |
| <b>3. Organizational learning and continuous improvement</b>                                                             | <b>82</b>                                | <b>76</b>                     | <b>87</b>                                | <b>91</b>                        | <b>85</b>                     | <b>86</b>                  |
| a. We are actively doing things to improve patient safety                                                                | 86.3                                     | 86.6                          | 92.4                                     | 95.9                             | 91.1                          | 92.9                       |
| b. Mistakes have led to positive changes here                                                                            | 76.5                                     | 70.1                          | 81.5                                     | 85.0                             | 77.3                          | 78.8                       |
| c. After we make changes to improve patient safety, we evaluate their effectiveness                                      | 84.0                                     | 72.7                          | 87.5                                     | 92.6                             | 87.9                          | 86.4                       |
| <b>4. Teamwork within units</b>                                                                                          | <b>78</b>                                | <b>77</b>                     | <b>84</b>                                | <b>89</b>                        | <b>85</b>                     | <b>85</b>                  |
| a. People support one another in this unit                                                                               | 85.7                                     | 82.7                          | 89.9                                     | 93.4                             | 89.8                          | 91.6                       |
| b. When a lot of work needs to be done quickly, we work together as a team to get the work done                          | 79.2                                     | 82.8                          | 86.6                                     | 92.3                             | 88                            | 88.5                       |
| c. In this unit, people treat each other with respect                                                                    | 75.9                                     | 77.1                          | 85.3                                     | 90.9                             | 84.2                          | 86.2                       |
| d. When one area in this unit gets really busy, others help out                                                          | 71.7                                     | 63.6                          | 73.3                                     | 78.9                             | 77.8                          | 75.5                       |

|                                                                                                   |           |           |           |           |           |           |
|---------------------------------------------------------------------------------------------------|-----------|-----------|-----------|-----------|-----------|-----------|
| <b>5. Non-punitive response to error</b>                                                          | <b>39</b> | <b>42</b> | <b>41</b> | <b>39</b> | <b>46</b> | <b>41</b> |
| a. Staff feel like their mistakes are held against them (R)                                       | 43.4      | 51.5      | 45.5      | 44.6      | 48.4      | 45.4      |
| b. When an event is reported, it feels like the person is being written up, not the problem (R)   | 45.6      | 42.0      | 48.6      | 43.9      | 54.7      | 50.8      |
| c. Staff worry that mistakes they make are kept in their personnel file (R)                       | 28.9      | 32.0      | 28.5      | 29.1      | 36.1      | 28.2      |
| <b>6. Staffing</b>                                                                                | <b>40</b> | <b>36</b> | <b>38</b> | <b>42</b> | <b>46</b> | <b>42</b> |
| a. We have enough staff to handle the workload                                                    | 61.9      | 39.8      | 60.7      | 69.4      | 65.3      | 58.7      |
| b. Staff in this unit work longer hours than is best for patient care (R)                         | 28.5      | 34.4      | 16.4      | 19.1      | 31.1      | 27.6      |
| d. We work in "crisis mode" trying to do too much, too quickly (R)                                | 28.8      | 35.2      | 36.5      | 37.3      | 40.5      | 39.1      |
| <b>7. Management support for patient safety</b>                                                   | <b>74</b> | <b>73</b> | <b>79</b> | <b>81</b> | <b>81</b> | <b>81</b> |
| a. Hospital management provides a work climate that promotes patient safety                       | 85.7      | 82.7      | 89.9      | 93.4      | 89.8      | 91.6      |
| b. The actions of hospital management show that patient safety is a top priority                  | 84.2      | 76.1      | 90.5      | 92.5      | 88.0      | 87.8      |
| c. Hospital management seems interested in patient safety only after an adverse event happens (R) | 52.1      | 60.2      | 57.0      | 56.7      | 63.7      | 62.8      |
| <b>8. Teamwork across hospital units</b>                                                          | <b>72</b> | <b>69</b> | <b>78</b> | <b>81</b> | <b>78</b> | <b>77</b> |
| a. Hospital units do not coordinate well with each other (R)                                      | 67.2      | 66.0      | 71.9      | 73.0      | 73.1      | 72.5      |
| b. There is good cooperation among hospital units that need to work together                      | 77.4      | 64.1      | 81.9      | 88.4      | 78.9      | 78.3      |
| c. It is often unpleasant to work with staff from other hospital units (R)                        | 63.0      | 74.4      | 71.4      | 71.2      | 76.7      | 73.0      |
| d. Hospital units work well together to provide the best care for patients                        | 81.5      | 70.7      | 88.5      | 92.9      | 84.2      | 84.3      |
| <b>9. Hospital handoffs and transitions</b>                                                       | <b>62</b> | <b>60</b> | <b>66</b> | <b>70</b> | <b>67</b> | <b>71</b> |
| a. Things "fall between the cracks" when transferring patients from one unit to another (R)       | 63.5      | 58.8      | 69.3      | 69.4      | 71.1      | 73.3      |
| b. Important patient care information is often lost during shift changes (R)                      | 66.0      | 68.1      | 68.3      | 70.5      | 70.9      | 75.7      |
| c. Problems often occur in the exchange of information across hospital units (R)                  | 57.1      | 60.3      | 62.6      | 69.2      | 60.6      | 65.8      |
| d. Shift changes are problematic for patients in this hospital (R)                                | 62.5      | 54.1      | 62.3      | 69.6      | 64.2      | 69.3      |
| <b>10. Communication openness</b>                                                                 | <b>75</b> | <b>73</b> | <b>75</b> | <b>75</b> | <b>74</b> | <b>75</b> |

|                                                                                                                                         |           |           |           |           |           |           |
|-----------------------------------------------------------------------------------------------------------------------------------------|-----------|-----------|-----------|-----------|-----------|-----------|
| a. Staff will freely speak up if they see something that may negatively affect patient care                                             | 85.6      | 89.3      | 89.0      | 86.3      | 88.7      | 91.1      |
| b. Staff feel free to question the decisions or actions of those with more authority                                                    | 83.5      | 77.9      | 79.6      | 85.8      | 84.2      | 78.8      |
| c. Staff are afraid to ask questions when something does not feel right (R)                                                             | 57.1      | 52.1      | 55.1      | 52.0      | 48.6      | 53.6      |
| <b>11. Feedback and communications about error</b>                                                                                      | <b>88</b> | <b>88</b> | <b>91</b> | <b>92</b> | <b>93</b> | <b>92</b> |
| a. We are given feedback about changes put into place based on event reports                                                            | 85.7      | 85.5      | 89.8      | 90.6      | 90.7      | 91.3      |
| b. We are informed about errors that happen in this unit                                                                                | 90.9      | 89.7      | 91.5      | 93.4      | 93.1      | 92.3      |
| c. In this unit, we discuss ways to prevent errors from happening again                                                                 | 88.9      | 90.3      | 92.7      | 91.6      | 94.7      | 92.8      |
| <b>12. Frequency of events reported</b>                                                                                                 | <b>73</b> | <b>70</b> | <b>70</b> | <b>69</b> | <b>72</b> | <b>72</b> |
| a. When a mistake is made, but is caught (noticed, discovered) and corrected before it affects the patient, how often is this reported? | 75.4      | 69.3      | 73.7      | 71.8      | 75.8      | 77.1      |
| b. When a mistake is made, but has no potential to harm the patient, how often is this reported?                                        | 75.7      | 61.4      | 65.7      | 68.3      | 63.5      | 65.7      |
| c. When a mistake is made that could harm the patient, but does not, how often is this reported?                                        | 72.8      | 75.4      | 71.7      | 67.0      | 76.9      | 73.0      |
